# Supplementary material
Source: PubMed Central journal article supplement (PMC6189639)
Supplement: NIHMS990127-supplement-SI.pdf [file NIHMS990127-supplement-SI.pdf]

Supporting information for  
**Differential substrate recognition by maltose binding proteins  
influenced by structure and dynamics**

*Shantanu Shukla,<sup>1,2</sup> Khushboo Bafna,<sup>1</sup> Caeley Gullett,<sup>2</sup> Dean A. A. Myles,<sup>1,2</sup>*

*Pratul K. Agarwal,<sup>3,\*</sup> Matthew J. Cuneo<sup>2,4,\*</sup>*

<sup>1</sup>Graduate School of Genome Science and Technology, The University of Tennessee, Knoxville, Tennessee

<sup>2</sup>Neutron Sciences Directorate, Oak Ridge National Laboratory, Oak Ridge, Tennessee

<sup>3</sup>Department of Biochemistry & Cellular and Molecular Biology, The University of Tennessee, Knoxville, Tennessee

<sup>4</sup>Department of Structural Biology, St. Jude Children's Research Hospital, Memphis, Tennessee

\*Corresponding authors: [pratul@agarwal-lab.org](mailto:pratul@agarwal-lab.org) , [matt.cuneo@stjude.org](mailto:matt.cuneo@stjude.org)

## METHODS

**Detailed methodology for computing protein-substrate interactions:** The energy for the enzyme-substrate interactions ( $E_{pro-sub}$ ) were calculated as a sum of electrostatic and van der Waals energy between atom pairs.

$$E_{pro-sub} = \sum (E_{el} + E_{vdw}) \quad (1)$$

$E_{el}$  is the electrostatic contribution,  $E_{vdw}$  is the van der Waals term and the summation runs over all atom pairs for the enzyme and substrate. The  $E_{el}$  and  $E_{vdw}$  terms were computed as follows

$$E_{el} = \frac{q_i q_j}{\epsilon(r) r_{ij}} \quad \text{and} \quad E_{vdw} = \frac{A_{ij}}{r_{ij}^{12}} - \frac{B_{ij}}{r_{ij}^6} \quad (2)$$

where  $q_i$ ,  $q_j$  are partial charges, and  $A_{ij}$ ,  $B_{ij}$  are Lennard-Jones parameters. These parameters were obtained from AMBER *ff14SB* force field. A distance-dependent dielectric function was used:

$$\epsilon(r_{ij}) = A + \frac{B}{1 + k \exp(-\lambda B r_{ij})} \quad (3)$$

$B = \epsilon_o A$ ;  $\epsilon_o = 78.4$  for water;  $A = -8.5525$ ;  $\lambda = 0.003627$  and  $k = 7.7839$ .

**Calculation of errors:** For calculations of the errors associated of interaction energy values, the sampled conformations were divided into two parts. The first set considered odd numbered frames stored during MD production runs, while the other set considered the even numbered frames. The difference between averaged values for these two sets is considered indicative of the errors associated with these values.

**Table S1: Starting X-ray coordinates for MD simulations.** PDB codes or other source used for modeling noted.

|                      | <b>tmMBP1</b>                        | <b>tmMBP2</b>                        | <b>tmMBP3</b>                        | <b>ecMBP</b>                         | <b>tMBP</b> |
|----------------------|--------------------------------------|--------------------------------------|--------------------------------------|--------------------------------------|-------------|
| <b>Apo</b>           | 2GHB                                 | Crystallized in this study           | Crystallized in this study           | 1JW4                                 |             |
| <b>Glucose</b>       |                                      |                                      | Computationally modeled <sup>a</sup> | Computationally modeled <sup>b</sup> |             |
| <b>Maltose</b>       | Computationally modeled <sup>c</sup> | Computationally modeled <sup>d</sup> | Crystallized in this study           | 1ANF                                 |             |
| <b>Trehalose</b>     |                                      |                                      |                                      |                                      | 1EU8        |
| <b>Maltotriose</b>   | 2GHA                                 | 2FN8                                 |                                      | 3MBP                                 |             |
| <b>Maltotetraose</b> | Crystallized in this study           | Crystallized in this study           |                                      | 4MBP                                 |             |

<sup>a</sup> To explore alternate binding sites, 2 alternate simulations were done for tMBP3-glucose (referred as tmMBP3-GLU1 and tmMBP3-GLU2)

<sup>b</sup> To explore alternate binding sites, 2 alternate simulations were done for ecMBP-glucose (referred as ecMBP-GLU1 and ecMBP-GLU2)

<sup>c</sup> To explore alternate binding sites, 2 alternate simulations were done for tMBP1-maltose (referred as tmMBP1-MAL1 and tmMBP1-MAL2)

<sup>d</sup> To explore alternate binding sites, 2 alternate simulations were done for tMBP2-maltose (referred as tmMBP2-MAL1 and tmMBP2-MAL2)

|        |    | <u>L1</u> |           | <u>H2</u>    |          |              |          |              |     |
|--------|----|-----------|-----------|--------------|----------|--------------|----------|--------------|-----|
| ecMBP  | 1  | KIEEGK    | LVIWINGDK | -GYNGLAEVGGK | FEKDTG   | GIKVTVEHPD   | -----    | KLEEKFPQVAAT | 53  |
| tmMBP1 | 3  | --MQPK    | LTIWCSEK  | -QVDILQKL    | GEEFKAKY | GVEVEVQYVN   | FQDI--   | KS--KFLTAAP  | 54  |
| tmMBP2 | 5  | ----TKL   | LTIWCSEK  | -QVDILQKL    | GEEFKAKY | GIPVEVQYVD   | FGSI--   | KS--KFLTAAP  | 54  |
| tmMBP3 | 19 | ---AVK    | ITMTSGG   | VGKELEVL     | KKQLEM   | FHQYYPDIEVEI | IPM      | PDSSTE       | 75  |
| tMBP   | 2  | -IEEGK    | IVFAVGG   | APNEIEY      | WKGVI    | AEFKYPGVT    | VELKRO   | ATDTEQ       | 60  |
|        |    |           |           |              |          |              |          |              |     |
| ecMBP  |    | GDGPDI    | IIFWAHDR  | FGGYAQS      | GLLAEITP | ---DKAFQDKL  | YPFTW-   | DAVRYN       | 108 |
| tmMBP1 |    | GQGADI    | IIVGAHDW  | VGELAVN      | GLIEIPN  | ----FSDLKN   | FYETAL-  | NAFSYG       | 108 |
| tmMBP2 |    | GQGADI    | IIVGAHDW  | VGELAVN      | GLIEIPN  | ----FSDLKN   | FYDTAL-  | KAFSYG       | 108 |
| tmMBP3 |    | ETDPDV    | LMLDVI    | WPAEFAPF     | --LEDL-- | TADKDYFEL    | GFLPGTV- | MSVTVN       | 130 |
| tMBP   |    | SSDPDV    | FLMDVA    | WLGQFI       | ASGWLEP  | LDDYVQK      | DNYDLSV  | FFQSVIN      | 120 |
|        |    |           |           |              |          |              |          |              |     |
| ecMBP  |    | AVEALS    | LIYNKDLLP | -----        | NPPKTW   | EEIPALDKEL   | KAK----- | GKSALM       | 155 |
| tmMBP1 |    | AMEAIA    | LIYNKDYVP | -----        | EPPKTM   | DELIEIAKQ    | IDEEFGG  | ---EVRGF     | 159 |
| tmMBP2 |    | AMEAIA    | LIYNKDYVD | -----        | SVPKTM   | DELIEKAKQ    | IDEEYGG  | ---EVRGF     | 159 |
| tmMBP3 |    | FTDAGL    | LYRKDLLE  | KYGYDH       | APRTWDEL | VEMAKKIS     | QAE----- | GIHGFW       | 185 |
| tMBP   |    | YIDAGL    | LYRKDLLE  | KYGYSK       | PETWQEL  | VEMAQKI      | QSGERET  | NPNF         | 180 |
|        |    |           |           |              |          |              |          |              |     |
| ecMBP  |    | ---TWPL   | IAADGGY   | AFKYENG      | KYDIKDV  | GVNAGAKAGL   | TFLVDL   | IKNKH        | 213 |
| tmMBP1 |    | ---IAPF   | IFGYGGY   | VFKQTE       | KGLDVND  | IGLANE       | GAIKGVK  | LLKRLV       | 215 |
| tmMBP2 |    | ---SAPF   | ILGYGGY   | VFKETP       | QGLDVT   | DIGLANE      | GAVKGAK  | LKRMID       | 215 |
| tmMBP3 |    | VCDFLE    | YLWSFG    | GGDVLDE      | ---SG--- | KVVIDS       | PEAVAAL  | QFMVDL       | 239 |
| tMBP   |    | VCDFVE    | YVYSN     | GGSLGE       | FKDGKW   | ---VPTLN     | KPENVEAL | QFMVDL       | 237 |
|        |    |           |           |              |          |              |          |              |     |
| ecMBP  |    | <b>H1</b> | ---SIAEAA | FNKGET       | AMTINGP  | WAWSNIDT     | --S--    | KVNYGV       | 263 |
| tmMBP1 |    | <b>MD</b> | ---SMFRE  | GQAAMI       | INGPWA   | IKAYKD       | -A--     | GIDYGV       | 267 |
| tmMBP2 |    | <b>MD</b> | ---SMFKE  | GLAAMI       | INGLWA   | IKSYKD       | -A--     | GINYGV       | 267 |
| tmMBP3 |    | <b>EE</b> | -DARRIF   | QNGEAV       | FMRNWPY  | AWSLVNS      | DESPIK   | GKVGVA       | 297 |
| tMBP   |    | <b>TE</b> | EPVRLM    | FQQGNA       | AFFERN   | WPYAWGL      | HNADDSP  | VKGVVA       | 296 |
|        |    |           |           |              |          |              |          |              |     |
| ecMBP  |    | AGINAAS   | SPN--     | KELAKE       | FL---    | ENYLLT       | DDEGLE   | AVNKKD       | 318 |
| tmMBP1 |    | FMVNAK    | SPN--     | KLLAIE       | FL---    | TSFIAK       | KETMYR   | IYLGDP       | 321 |
| tmMBP2 |    | FMINAK    | SPN--     | KVIAME       | FL---    | TNFIAR       | KETMYK   | IYLADP       | 321 |
| tmMBP3 |    | LGINKF    | SSPEE     | KEAAK        | LKIKFL   | TSYDQQL      | --YKAI   | NAGQN        | 355 |
| tMBP   |    | IGISKY    | SDN--     | KALAW        | EFVKF    | VESYSV       | QK--     | GFAMN        | 352 |
|        |    |           |           |              |          |              |          |              |     |
| ecMBP  |    | ATMENA    | QKGEIM    | PNIPQM       | SAFWY    | AVRTAVINA    | ASGRQT   | VDEAL        | 370 |
| tmMBP1 |    | GFTLSA    | ANGIPM    | PNVPQM       | AAVWA    | AMNDALN      | LVVNGK   | ATVEEAL      | 376 |
| tmMBP2 |    | AFTQSA    | SMGTPM    | PNVPEM       | APVWS    | AMGDALS      | IINGQAS  | VEDAL        | 379 |
| tmMBP3 |    | ELLGVI    | FINAL     | PRVANY       | TEVSD    | VIQRYV       | HAALTR   | QTTSED       | 409 |
| tMBP   |    | ELRAVF    | ENAVPR    | PIVPPY       | PQLSEI   | IQKYVNS      | ALAGKIS  | PQEA         | 408 |

**Figure S1: Structure based sequence alignment of thermophilic and mesophilic MBPs.** Structural elements that determine the differential substrate binding are highlighted: Loop 1 (L1) in green; helix 1 (H1) in yellow; helix 2 (H2) in red; and helix 3 (H3) in cyan. The analysis was performed using the PROMALS3D server and Clustal Omega.

## tri-saccharide

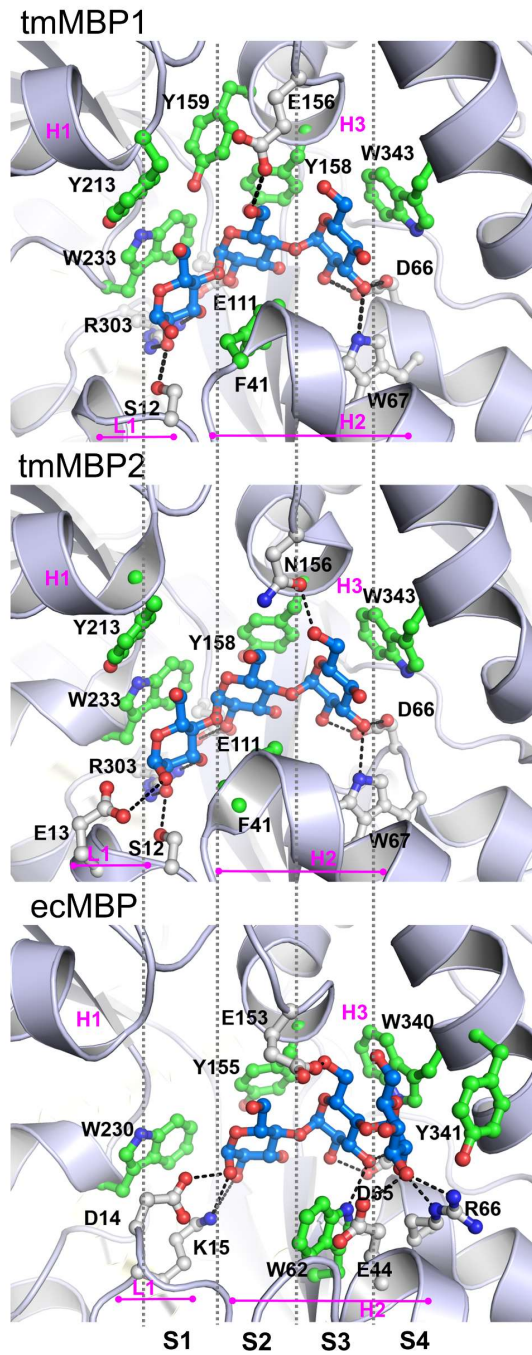

**Figure S2: Differential binding of trisaccharide maltotriose.** The bound substrates are shown in blue sticks and protein residues are shown as green (hydrophobic contact with substrates) and gray (hydrophilic contact with substrates) sticks. Sub-sites in the binding pocket (S1, S2, S3 and S4) are separated by gray vertical lines.

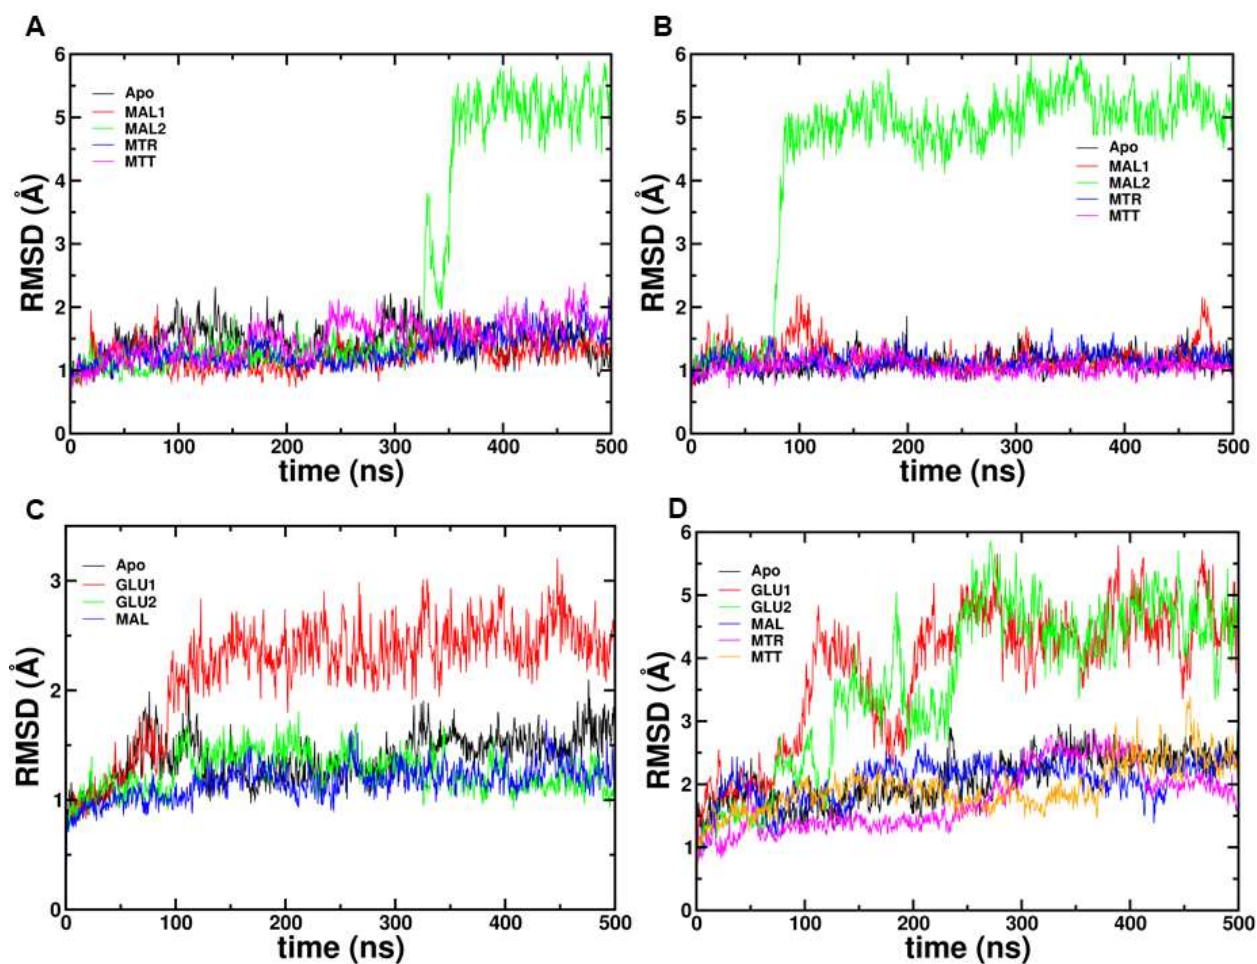

**Figure S3: Root mean square deviations (RMSD) computed from the MD simulations.** (A) tmMBP1, (B) tmMBP2, (C) tmMBP3, (D) ecMBP. See Figure 3 of main text for substrate key. First structure of the simulation was used as reference for RMSD calculations. Large deviations indicate change in conformation of the protein due to substrate leaving the pocket and protein opening up.

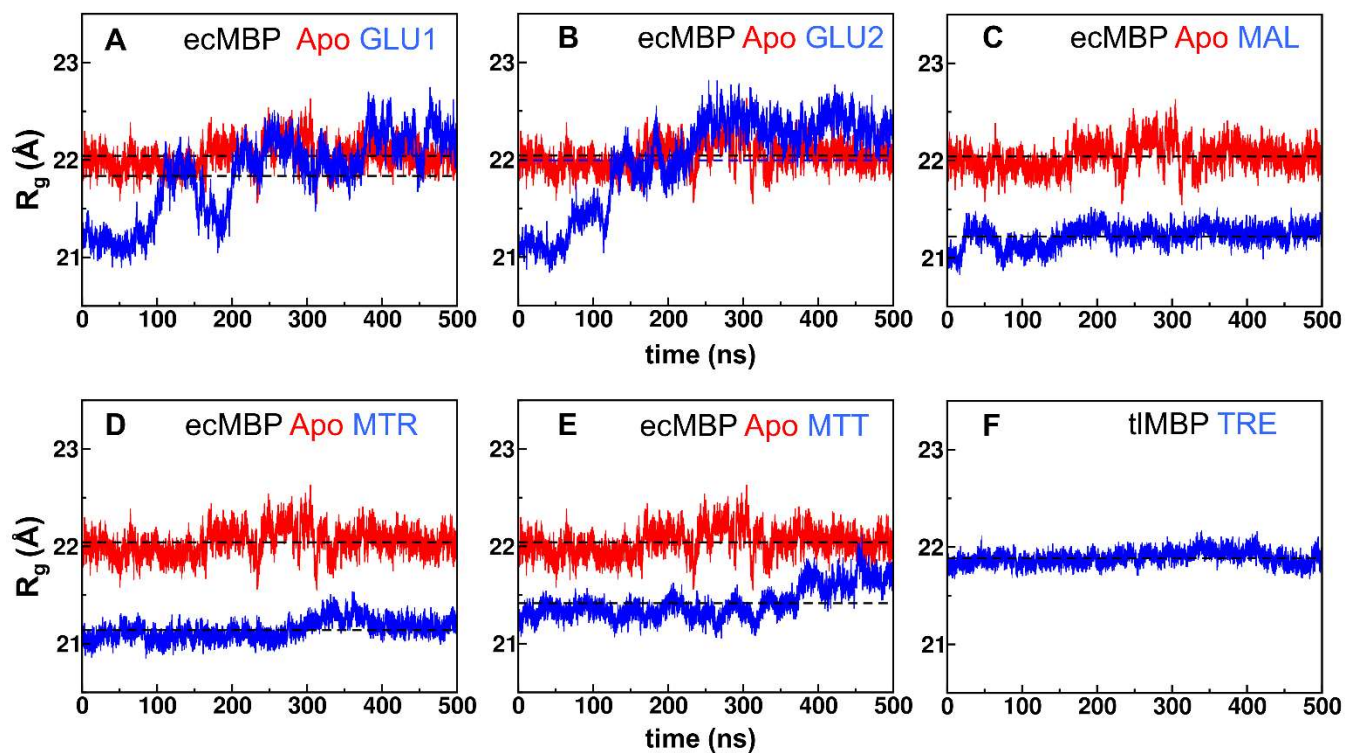

**Figure S4: Radius of gyration ( $R_g$ ) computed from MD simulations.**  $R_g$  for apo simulations depicted in red and the substrate bound simulations in blue, and average value of  $R_g$  computed from all simulation snapshots are shown by horizontal lines. Results are shown for ecMBP bound to glucose (GLU, panels A-B), maltose (MAL, panel C), maltotriose (MTR, panel D) and maltotetraose (MTT, panel E); and trehalose (TRE) bound to tIMBP (panel F). GLU1 simulation started with glucose in S1 binding pocket and GLU2 in the S2 binding pocket.

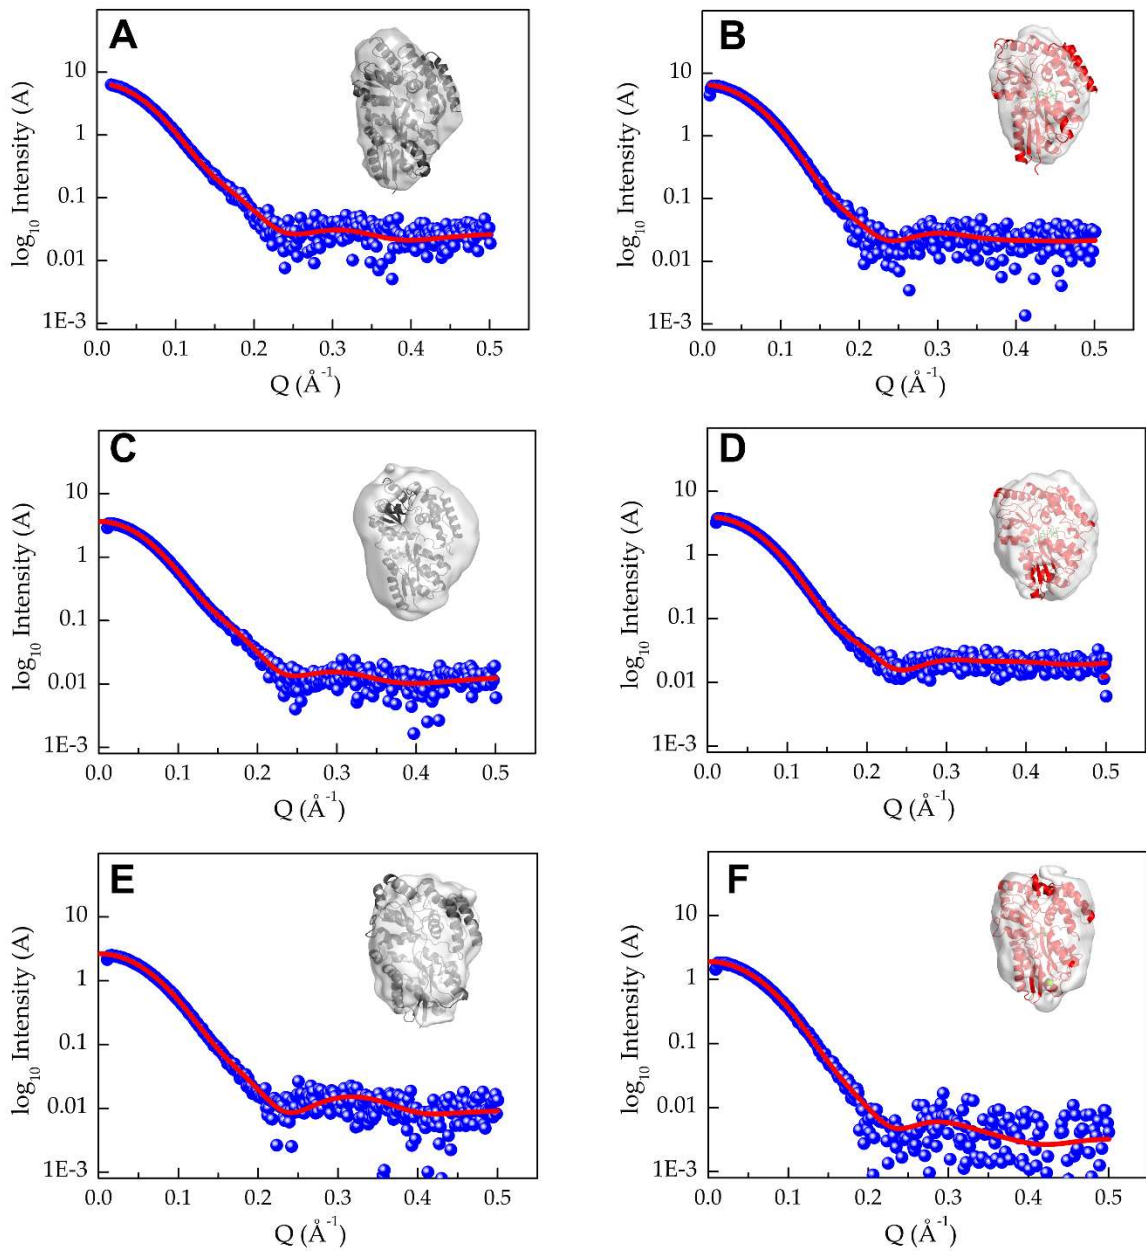

**Figure S5: SAXS of apo and substrate-bound tmMBPs.** Experimental SAXS data of (A) apo tmMBP1, (B) maltotetraose bound tmMBP1, (C) apo tmMBP2, (D) maltotetraose bound tmMBP2, (E) apo tmMBP3, and (F) maltose bound tmMBP3. Solid red lines are the SAXS data calculated from the respective crystal structures. Inset is the ab-initio model generated from the SAXS data superimposed on the crystal structures.



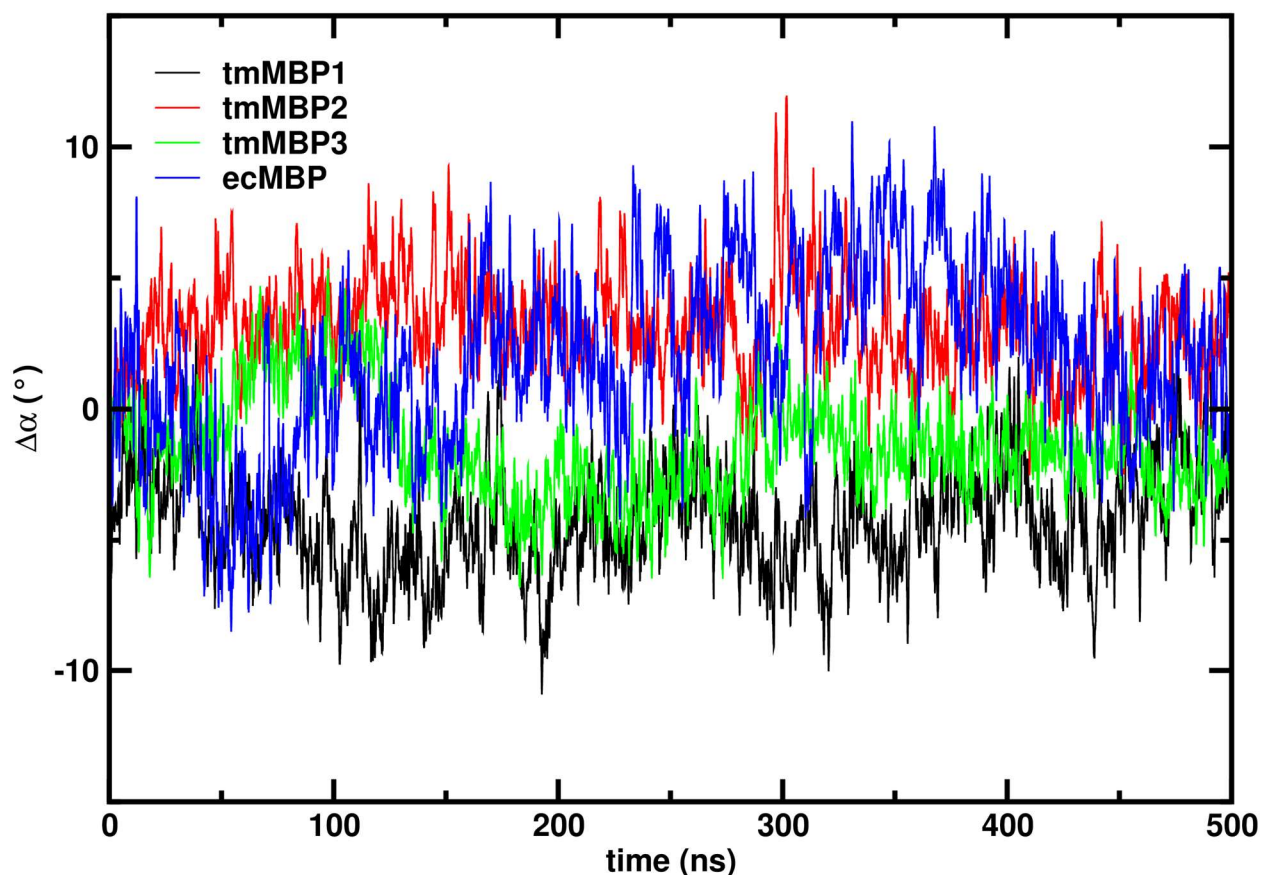

**Figure S6: Variation of hinge angle for apo MBPs.** The hinge angle variation from first frame is depicted over the course of MD for tmMBP1 (black line), tmMBP2 (red), tmMBP3 (green) and ecMBP (blue). The angle was computed between the center of mass for N-terminal domain, hinge region, and C-terminal domain as defined by residues in the table below.

|               | N-terminal domain | Hinge    | C-terminal domain |
|---------------|-------------------|----------|-------------------|
| <b>tmMBP1</b> |                   |          |                   |
| Apo           | 4-110, 265-315    | 111, 264 | 112-263, 316-376  |
| MAL1/MAL2     | 3-110, 265-315    | 111, 264 | 112-263, 316-376  |
| MTR           | 3-110, 265-315    | 111, 264 | 112-263, 316-376  |
| MTT           | 3-110, 265-315    | 111, 264 | 112-263, 316-377  |
| <b>tmMBP2</b> |                   |          |                   |
| Apo           | 5-110, 265-317    | 111, 264 | 112-263, 318-377  |
| MAL1/MAL2     | 6-110, 265-315    | 111, 264 | 112-263, 316-384  |
| MTR           | 6-110, 265-315    | 111, 264 | 112-263, 316-384  |
| MTT           | 5-110, 265-317    | 111, 264 | 112-263, 318-383  |
| <b>tmMBP3</b> |                   |          |                   |
| Apo           | 19-133, 296-352   | 134, 295 | 135-294, 353-411  |
| GLU1/GLU2     | 19-133, 296-352   | 134, 295 | 135-294, 353-409  |
| MAL           | 19-133, 296-352   | 134, 295 | 135-294, 353-409  |
| <b>ecMBP</b>  |                   |          |                   |
| All           | 1-110, 261-313    | 111, 260 | 112-259, 314-370  |

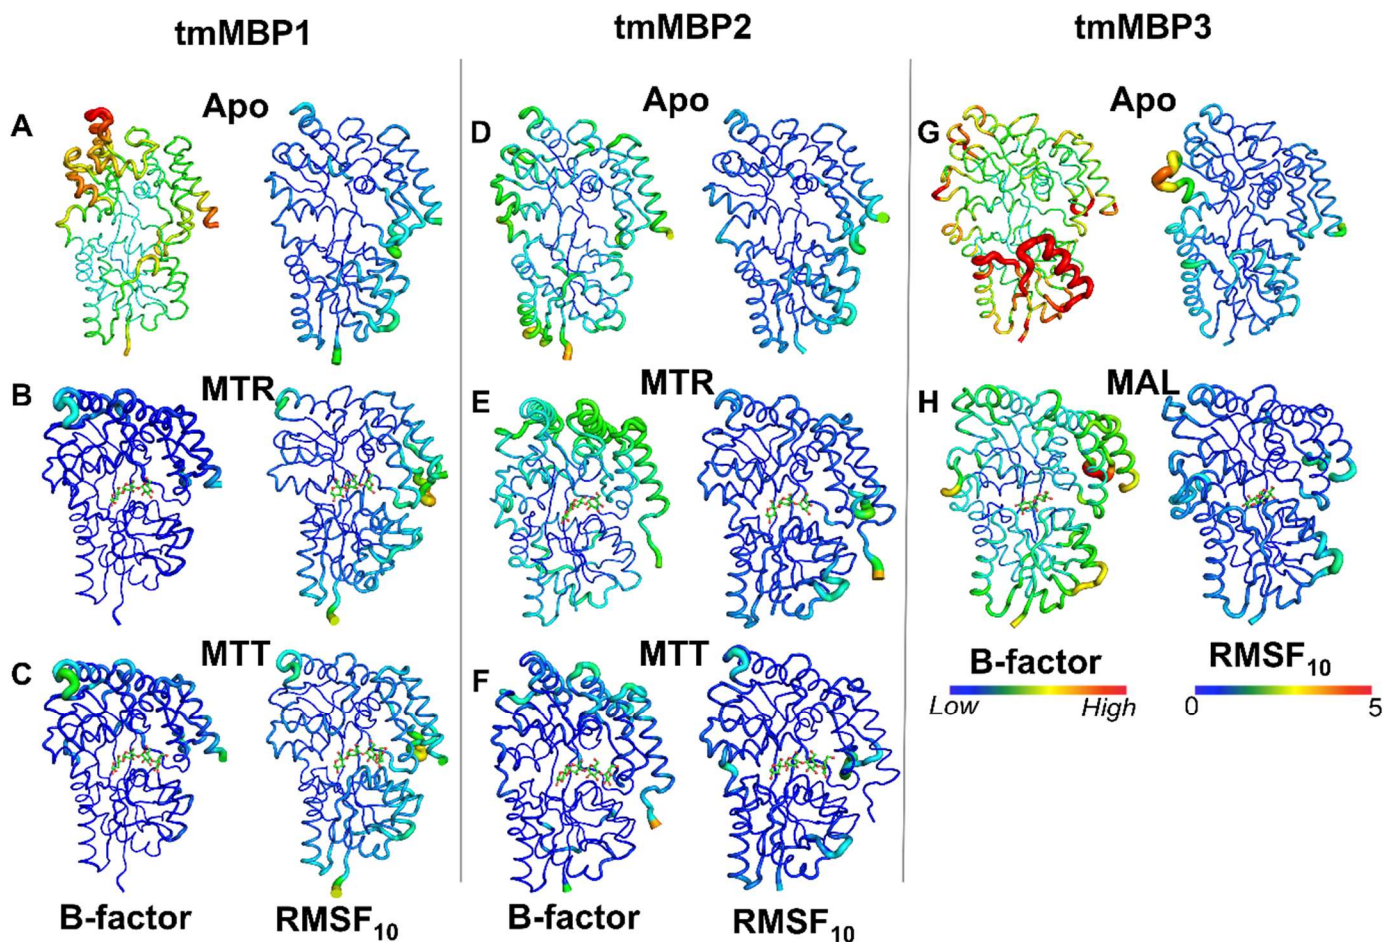

**Figure S7: Comparison of crystallographic  $\beta$ -factors with computational all atom root mean square fluctuations ( $\text{RMSF}_{10}$ ) of tmMBPs.** (A) tmMBP1 Apo, (B) tmMBP1 maltotriose, (C) tmMBP1 maltotetraose, (D) tmMBP2 apo, (E) tmMBP2 maltotriose, (F) tmMBP2 maltotetraose, (G) tmMBP3 apo and (H) tmMBP3 maltose. Proteins are represented with tube width corresponding to crystallographic B-factor on left. On right side tube width corresponds to  $\text{RMSF}_{10}$  fluctuations.

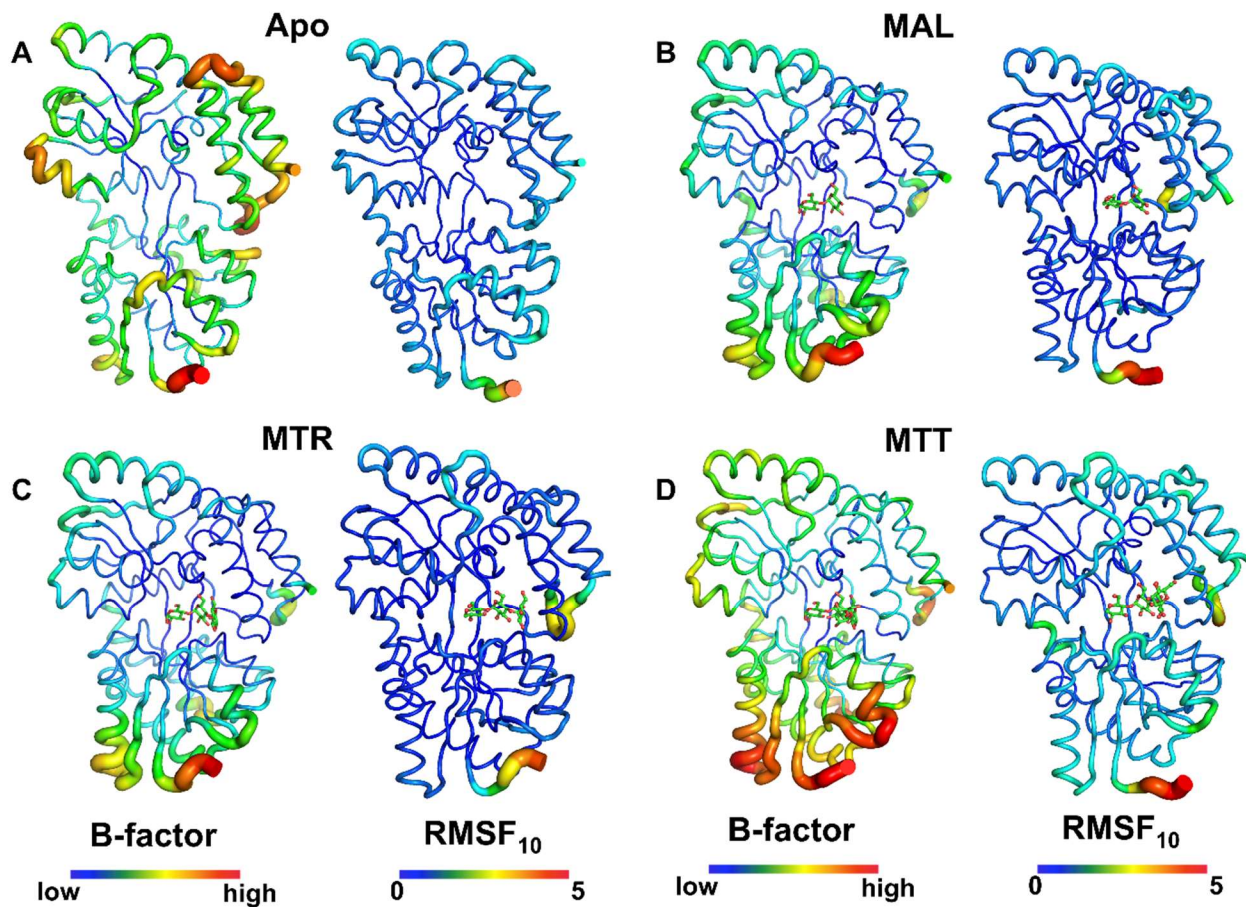

**Figure S8: Comparison of crystal B-factors with computational all atom root mean square fluctuations (RMSF<sub>10</sub>) of ecMBP.** (A) ecMBP apo, (B) ecMPB maltose, (C) ecMBP maltotriose, and (D) ecMBP maltotetraose. Proteins are represented with tube width corresponding to crystallographic B-factor on left. On right side tube width corresponds to RMSF<sub>10</sub> fluctuations.

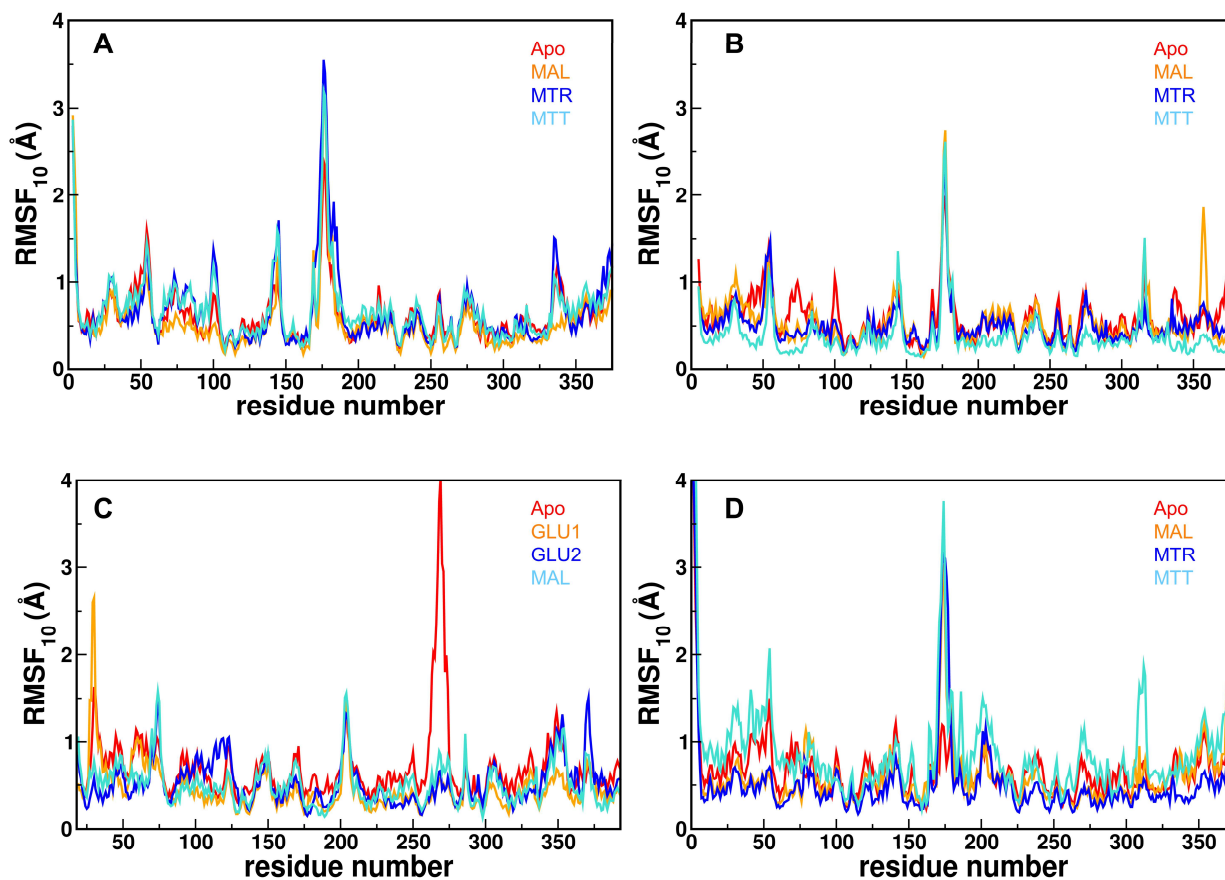

**Figure S9: All atom RMSF<sub>10</sub> plot of tmMBP and ecMBP systems.** (A) tmMBP1 apo and substrate-bound forms, (B) tmMBP2 apo and substrate-bound forms, (C) tmMBP3 apo and substrate-bound forms, (D) ecMBP apo and substrate-bound forms. All the apo proteins show larger change in RMSF<sub>10</sub> values than the substrate bound proteins.

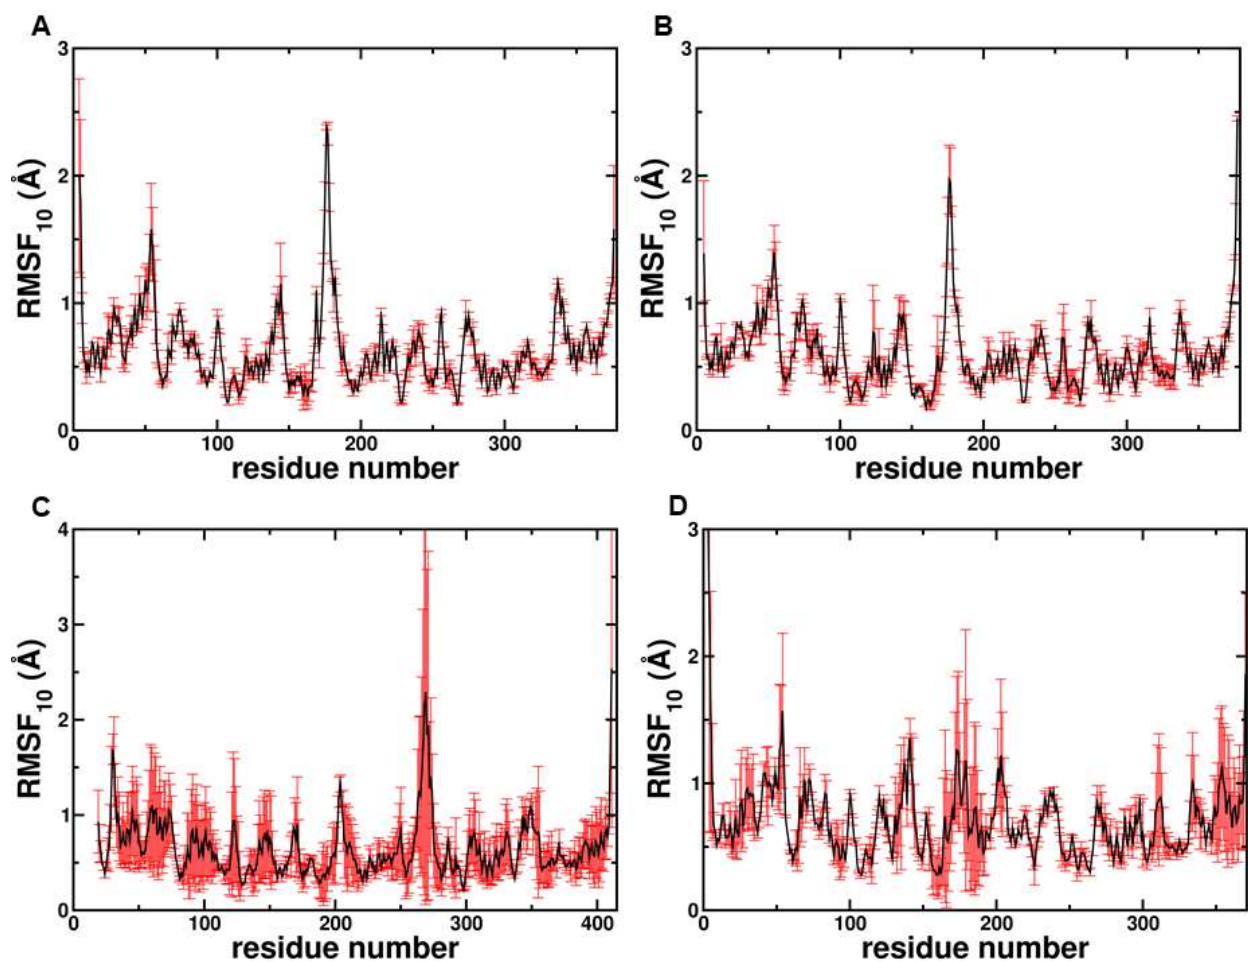

**Figure S10: Errors associated with computed  $\text{RMSF}_{10}$ .** (A) apo tmMBP1, (B) apo tmMBP2, (C) apo tmMBP3, (D) apo ecMBP. The errors were computed by dividing the MD trajectories into two halves: 0-0.25  $\mu\text{s}$  and 0.25-0.50  $\mu\text{s}$ . The  $\text{RMSF}_{10}$  values were calculated for each half, the difference in values is considered as error (red bars), while the average of the two values is plotted as black curves. The data shown in the main manuscript and previous supporting figure is based on computation of  $\text{RMSF}_{10}$  based on the entire 0.5  $\mu\text{s}$  trajectory.

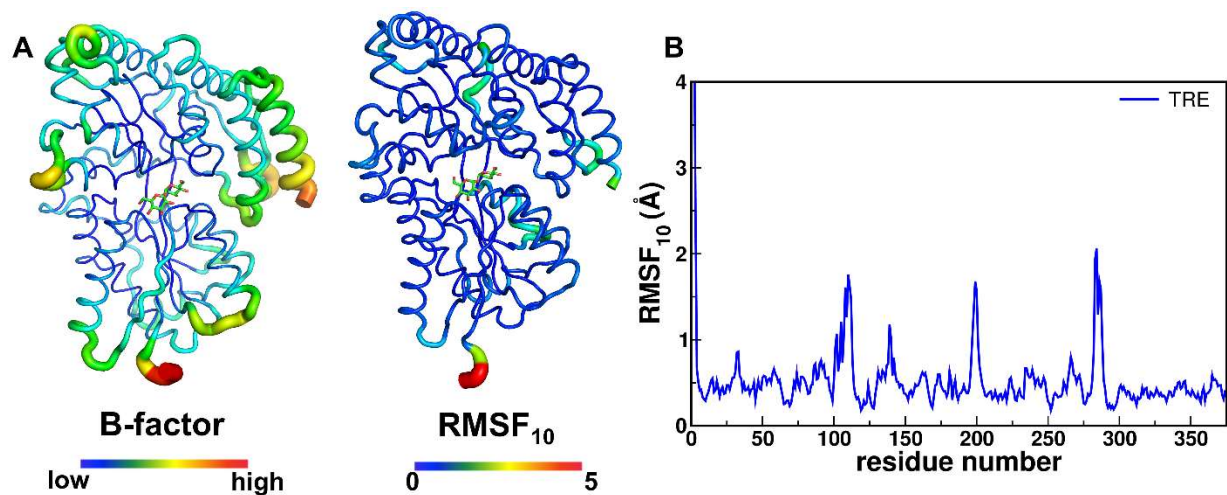

**Figure S11: Conformational flexibility of the trehalose-bound tMBP.** (A) B-factor and RMSF<sub>10</sub> tube structure showing the overall change in the dynamics of the protein after 0.5  $\mu$ s of simulations. The thickness of the tubes suggests the degree of fluctuations at that particular site. (B) An all atom RMSF<sub>10</sub> plot showing the larger fluctuations in the structure.

**Table S2: List of residues making favorable contact obtained from interaction energy analysis.**

| <b>Protein</b> | <b>Substrate</b>       | <b>Strong<br/>&lt; -6 kcal/mol</b> | <b>Strong<br/>-5 to -3 kcal/mol</b>                                               | <b>Moderately Favorable<br/>-2 kcal/mol</b> |
|----------------|------------------------|------------------------------------|-----------------------------------------------------------------------------------|---------------------------------------------|
| <b>tmMBP1</b>  | maltose<br>(MAL)       |                                    | Glu 13<br>Phe 41<br>Glu 111<br>Tyr 158<br>Trp 233<br>Arg 303                      | Lys 14<br>Tyr 159                           |
|                | maltotriose<br>(MTR)   |                                    | Glu 13<br>Phe 41<br>Asp 66<br>Glu 111<br>Tyr 158<br>Trp 233<br>Arg 303<br>Trp 343 | Lys 14<br>Trp 67                            |
|                | maltotetraose<br>(MTT) |                                    | Glu 13<br>Phe 41<br>Asp 66<br>Glu 111<br>Tyr 158<br>Trp 233<br>Arg 303<br>Trp 343 | Lys 14<br>Gln 42                            |
| <b>tmMBP2</b>  | maltose<br>(MAL)       |                                    | Glu 13<br>Phe 41<br>Glu 111<br>Tyr 158<br>Trp 233<br>Arg 303                      | Lys 14<br>Tyr 213                           |
|                | maltotriose<br>(MTR)   |                                    | Glu 13<br>Phe 41<br>Asp 66<br>Glu 111<br>Tyr 158<br>Trp 233<br>Arg 303<br>Trp 343 | Lys 14<br>Trp 67                            |
|                | maltotetraose<br>(MTT) | Asp 66<br>Trp 233                  | Glu 13<br>Phe 41<br>Lys 45<br>Glu 111<br>Tyr 158<br>Arg 303<br>Trp 343            | Lys 14<br>Trp 67<br>Asn 156                 |
| <b>tmMBP3</b>  | glucose<br>(GLU1)      |                                    | Glu 32<br>Arg 64                                                                  | Val 29<br>Trp 258                           |

|              |                        |        |                                                                        |                                                                          |
|--------------|------------------------|--------|------------------------------------------------------------------------|--------------------------------------------------------------------------|
|              |                        |        | Asp 133<br>Glu 240<br>Trp 296                                          | Tyr 260                                                                  |
|              | glucose<br>(GLU2)      |        | Asp 85<br>Trp 258<br>Arg 367                                           | Asp 133                                                                  |
|              | maltose<br>(MAL)       | Arg 64 | Glu 32<br>Asp 85<br>Trp 258<br>Tyr 260<br>Trp296                       | Val 29<br>Ser 61<br>Asp 133<br>Glu 183                                   |
| <b>ecMBP</b> | glucose<br>(GLU1)      |        | Trp 62<br>Glu 111                                                      | Asn12<br>Tyr 155                                                         |
|              | glucose<br>(GLU2)      | Asp 65 | Trp 62<br>Arg 66<br>Tyr 155<br>Trp 340                                 | Glu 153                                                                  |
|              | maltose<br>(MAL)       | Asp 65 | Trp 62<br>Arg 66<br>Glu 153<br>Tyr 155<br>Trp 340                      | Lys 15<br>Glu111<br>Trp 230                                              |
|              | maltotriose<br>(MTR)   | Asp 65 | Glu 44<br>Trp 62<br>Arg 66<br>Glu 111<br>Tyr 155<br>Trp 340<br>Tyr 341 | Glu 153<br>Trp 230<br>Ser 337<br>Arg 344                                 |
|              | maltotetraose<br>(MTT) |        | Asp 65<br>Tyr 155<br>Trp 230<br>Trp 340                                | Glu 45<br>Trp 62<br>Arg 66<br>Ser 337<br>Trp 340<br>Tyr 341<br>Arg 344   |
| <b>tIMBP</b> | trehalose<br>(TRE)     | Glu 17 | Asp 70<br>Trp 257<br>Trp 295<br>Arg 364                                | Arg 49<br>Tyr 121<br>Asp 123<br>Tyr 259<br>Gly 293<br>Gly 294<br>Trp 331 |
